# Supplementary material for: New push–pull polyene chromophores containing a Michler's base donor and a tricyanofuran acceptor: multicomponent condensation, allopolar isomerism and large optical nonlinearity
Source: Royal Society of Chemistry journal article supplement (doi:10.1039/c7tc00358g), 2017-01-01
Supplement: c7tc00358g1.pdf [file c7tc00358g1.pdf]

**Electronic Supplementary Information (ESI) for  
New Push-Pull Polyene Chromophores Containing Michler's Base Donor and  
Tricyanofuran Acceptor: Multicomponent Condensation, Allopolar Isomerism and Large  
Optical Nonlinearity**

Jingdong Luo,<sup>\*a</sup> Francis Lin,<sup>a</sup> Zhong'an Li,<sup>a</sup> Ming Li,<sup>a</sup> Tae-Dong Kim,<sup>a</sup> Sei-Hum Jang<sup>a</sup>  
and Alex K-Y. Jen<sup>\*a,b</sup>

<sup>a</sup>Department of Materials Science and Engineering, University of Washington, Seattle, WA 98195-2120

<sup>b</sup>Department of Biology & Chemistry, City University of Hong Kong, Kowloon, HK.

**Table of Content**

|                                                          |       |
|----------------------------------------------------------|-------|
| Experimental section                                     | ESI-2 |
| Synthesis of Compound <b>4a</b> and <b>4b</b>            | ESI-2 |
| Cyclic Voltammograms of Compound <b>4a</b> and <b>4b</b> | ESI-3 |
| <sup>1</sup> H-NMR and <sup>13</sup> C-NMR Spectra       | ESI-4 |
| DSC Curves of Chromophores <b>4a</b> and <b>4b</b>       | ESI-8 |
| References                                               | ESI-9 |

## Experimental section

**General Methods.** All chemicals were purchased from Aldrich and used as received. Compounds **1**, **2** and **3a-b** were prepared according to the literature procedures with modifications, respectively.<sup>1,2,3</sup> The <sup>1</sup>H and <sup>13</sup>C NMR spectra were recorded on a Bruker AV500 spectrometer using CDCl<sub>3</sub> as solvent in all cases. High-resolution mass spectrometry (HRMS) was performed on Bruker APEX III 47e Fourier Transform mass spectrometer. Thermal transitions were analyzed with a TA Instruments differential scanning calorimeter (DSC) Q20 under nitrogen at a heating rate of 10 °C/min. Cyclic voltammetric data were measured on a Model 600E Series Electrochemical Analyzer/Workstation using a conventional three-electrode cell with a glassy carbon working electrode, Pt wire counter-electrode, and Ag/AgCl reference electrode at a scan rate of 100 mV/s. The 0.1 M tetrabutylammonium hexafluorophosphate (TBAPF<sub>6</sub>) in CH<sub>2</sub>Cl<sub>2</sub> is the electrolyte and referenced to the FeCp<sub>2</sub>/FeCp<sub>2</sub><sup>+</sup> redox couple. The UV-vis-NIR spectra were recorded on a Varian Cary 5000 UV-Vis-NIR Spectrophotometer.

**Poling Conditions and  $r_{33}$  Measurement.** For studying the E-O property derived from the chromophores, guest-host polymers were generated by formulating chromophores **4a** (10 wt%) into poly(styrene-*co*-methyl methacrylate) (PS-*co*-PMMA) using 1,1,2-trichloroethane (TCE) as the solvent, or **4b** (33 wt%) into poly(bisphenol-A carbonate) with dibromomethane as the solvent. The resulting solutions (with the solid content of 10 wt % for **4a**/PMMA, or 6 wt% for **4b**/polycarbonate) were filtered through a 0.2- $\mu$ m PTFE filter and spin-coated onto thin-film device (TFD) indium tin oxide (ITO) glass substrates. Films of doped polymers were baked in a vacuum oven at 60-70 °C overnight to ensure the removal of the residual solvent. Then, a thin layer of gold was sputtered onto the films as a top electrode for contact poling. The poling temperature was 115 °C for **4a**/PMMA samples and 140 °C for **4b**/polycarbonate, and the poling field was set at 100 V/ $\mu$ m. The  $r_{33}$  values were measured using Teng-Man simple reflection technique at the wavelength of 1.31  $\mu$ m, and we use a carefully selected thin ITO electrode with low reflectivity and good transparency in order to minimize the contribution from multiple reflections.<sup>4</sup>

**Compound 4a.** Compound **1** (100 mg, 0.31 mmol), bridge intermediate **2** (50 mg, 0.31 mmol) and acceptor **3a** (63 mg, 0.31 mmol) were mixed in 1.3 mL of anhydrous ethanol, followed by the addition of added 0.4 mL of acetic anhydride and one drop of pyridine. The reaction mixture was allowed to stir at 70 °C for 30 minutes and monitored by TLC. After removal of the solvents, the crude product was purified by flash chromatography eluting with methylene chloride. Further purification of the product by reprecipitation from methanol/dichloromethane afforded the desired product as bronze-colored crystalline solid (150 mg, yield: 75%). Melting Point (mp) by DSC: ~250 °C. <sup>1</sup>H NMR (CDCl<sub>3</sub>, 500 MHz)  $\delta$  7.62 (d,  $J$  = 15 Hz, 1H), 7.28 (d,  $J$  = 10 Hz, 2H), 7.18 (d,  $J$  = 10 Hz, 2H), 7.05 (d,  $J$  = 15 Hz, 1H), 6.69 (d,  $J$  = 10 Hz, 2H), 6.62 (m, 3H), 6.36 (d,  $J$  = 15 Hz, 1H), 3.45 (m, 8H), 2.97 (s, 2H), 2.84 (s, 2H), 1.75 (s, 6H), 1.21 (m, 12H); <sup>13</sup>C NMR (CDCl<sub>3</sub>, 125 MHz)  $\delta$  175.7, 172.5, 152.4, 148.5, 148.2, 141.8, 139.1, 137.7, 132.9, 130.7, 130.6, 129.3, 125.8, 114.2, 111.0, 110.7, 96.7, 96.5, 55.3, 44.5, 44.3, 27.4, 26.9, 25.9, 12.7, 12.6; HRMS (m/z, ESI) Calcd for 644.3150, found 644.3137.

**Compound 4b.** Compound **1** (100 mg, 0.31 mmol), bridge intermediate **2** (50 mg, 0.31 mmol) and acceptor **3b** (104 mg, 0.31 mmol) were mixed in 1.3 mL of anhydrous ethanol, followed by the addition of added 0.4 mL of acetic anhydride and one drop of pyridine. The reaction mixture was allowed to stir at 65 °C for 30 minutes and monitored by TLC. After removal of the solvents, the crude product was purified by flash chromatography eluting with methylene chloride. Further purification of the product by reprecipitation from methanol/dichloromethane afforded the desired product as dark solid (160 mg, yield: 66%). <sup>1</sup>H NMR (CDCl<sub>3</sub>, 500 MHz)  $\delta$  7.66 (d,  $J$  = 5 Hz, 2H), 7.59 (d,  $J$  = 5 Hz, 2H), 7.46 (t,  $J$  = 5 Hz, 2H), 7.40 (m, 3H), 7.28 (m, 3H), 7.13 (d,  $J$  = 10 Hz, 2H), 6.98 (d,  $J$  = 15 Hz, 2H), 6.66 (d,  $J$  = 10 Hz, 2H), 6.61 (d,  $J$  = 10 Hz, 2H), 6.57 (d,  $J$  = 15 Hz, 2H), 6.37 (d,  $J$  = 15 Hz, 2H), 3.41 (m, 8H), 2.88 (s, 2H), 2.74 (s, 2H), 2.16 (s, 6H), 1.22 (m, 12H); <sup>13</sup>C NMR (CDCl<sub>3</sub>, 125 MHz)  $\delta$  175.9, 172.0, 152.7, 148.6, 148.3, 148.0, 143.2, 141.8, 139.7, 139.3, 139.1, 135.1, 132.9, 130.7, 129.3, 128.9, 128.0, 127.2, 126.4, 125.9, 120.5, 114.3, 112.4, 111.7, 111.1, 110.8, 98.1, 96.6, 55.8, 44.5, 44.3, 27.2, 25.9, 24.8, 12.7; HRMS (m/z, ESI) Calcd for 781.3541,

found 781.3532.

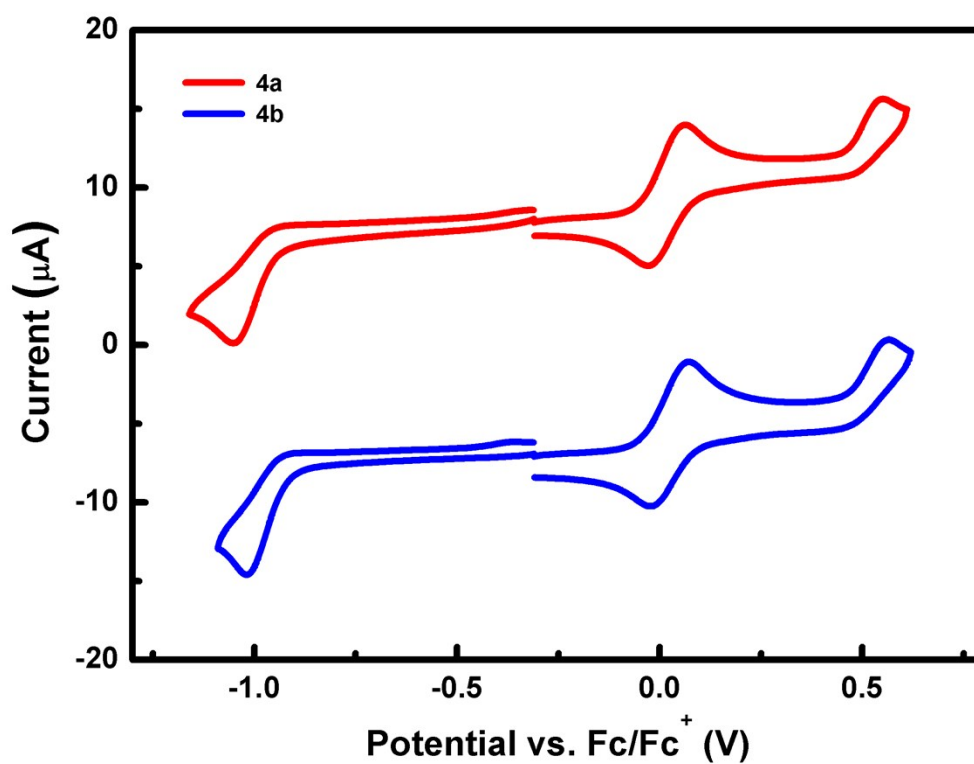

**Figure ESI-1.** Cyclic voltammograms of chromophores **4a** and **4b** recorded in CH<sub>2</sub>Cl<sub>2</sub> solutions containing 0.1 M Bu<sub>4</sub>NPF<sub>6</sub> supporting electrolyte at a scan rate of 100 mV/s.

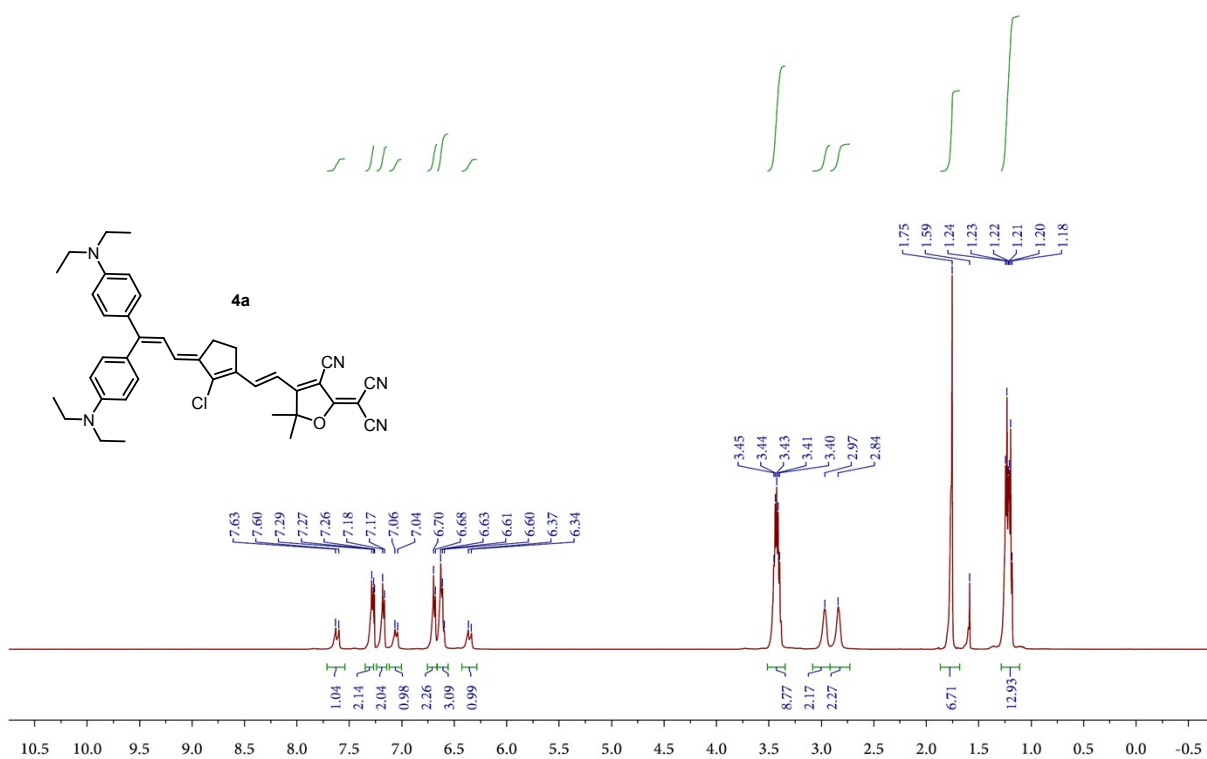

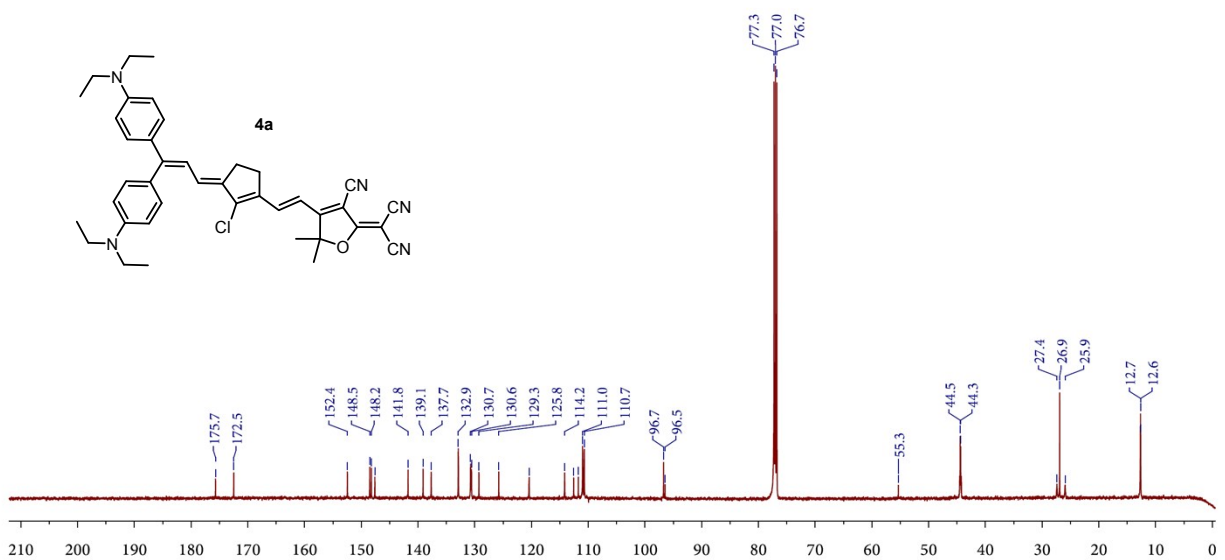

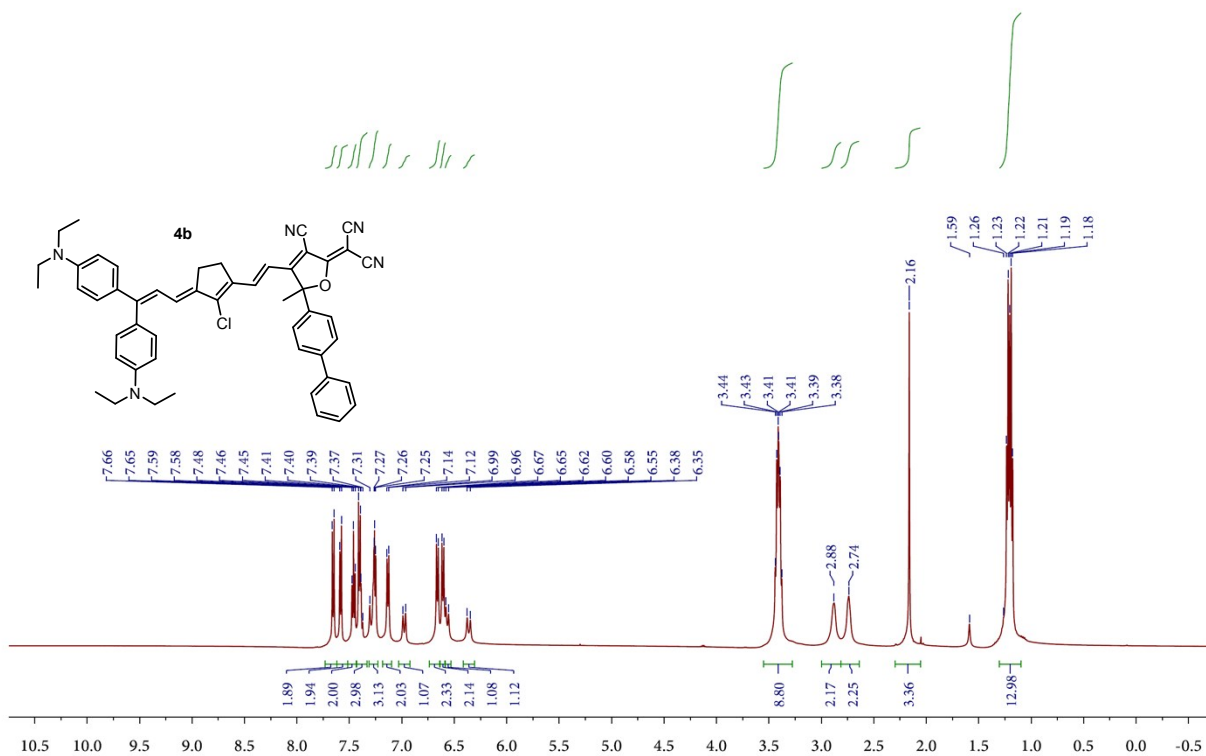

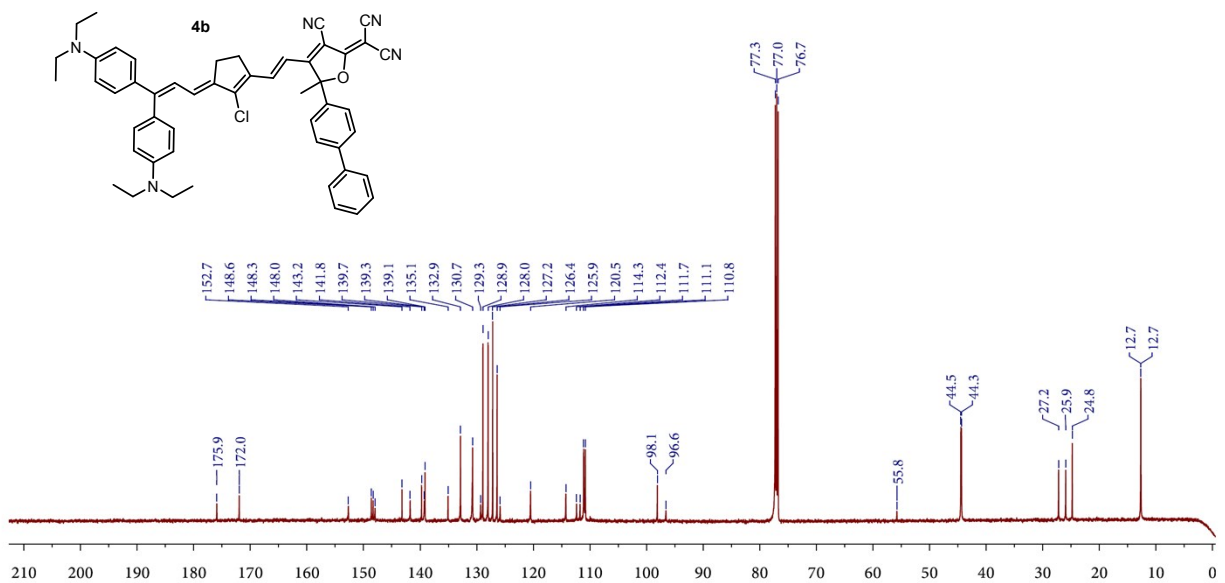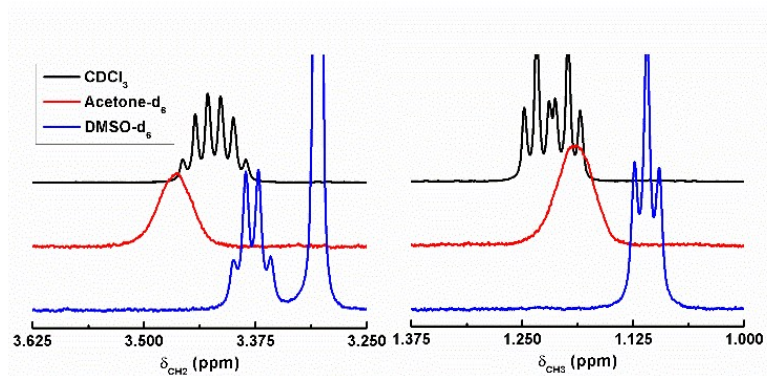

**Figure ESI-2.** The  $^1\text{H}$  NMR spectra of the *N,N*-diethylamino group in compound 4a in deuterated solvents of  $\text{CDCl}_3$ , Acetone- $\text{d}_6$  and DMSO- $\text{d}_6$  with different dielectric constant. Left, chemical shift for the methylene proton of  $\text{NCH}_2\text{CH}_3$ ; Right, chemical shift for the methyl proton of  $\text{NCH}_2\text{CH}_3$ .

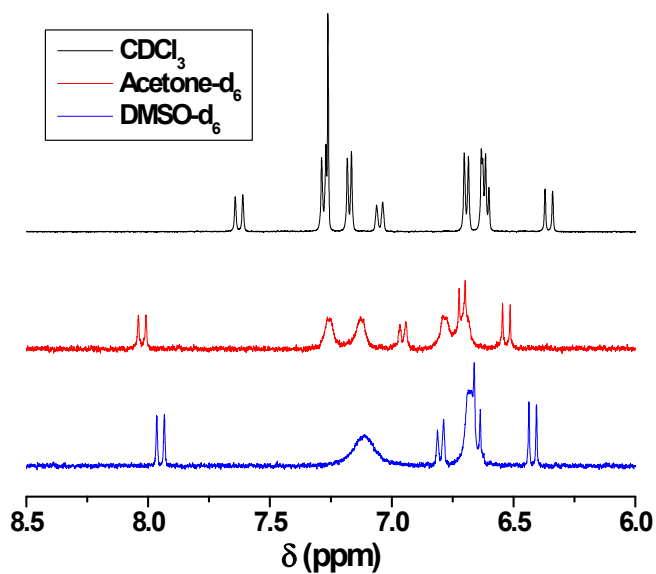

**Figure ESI-3.** The  $^1\text{H}$  NMR spectra of compound **4a** with chemical shift ranged from  $\sim 6.3$  ppm to  $\sim 8.0$  ppm in deuterated solvents of  $\text{CDCl}_3$ ,  $\text{Acetone-d}_6$  and  $\text{DMSO-d}_6$ .

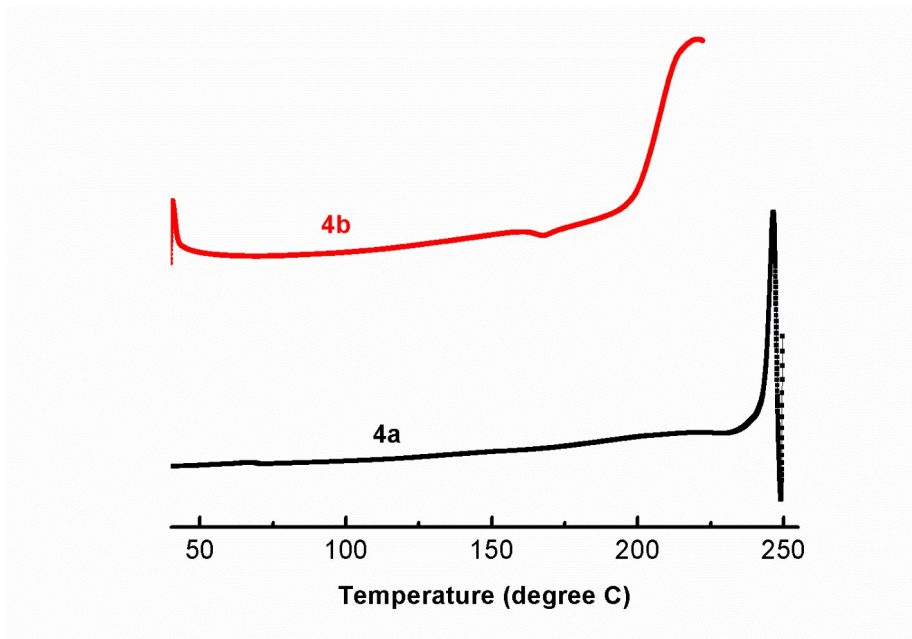

**Figure ESI-4.** DSC curves of chromophores **4a** and **4b** with a heating rate of  $10\text{ }^\circ\text{C/min}$  in nitrogen.



**References:**

1. Yanagisawa, S., Adeka Corporation, 2010. Compound, optical filter and optical recording material using the same. US Patent 7,695,793.
2. Caputo, G. and Della Ciana, L., 2004. Symmetric, monofunctionalised polymethine dyes labelling reagents. US Patent 6,747,159.
3. a) He, Mingqian, Thomas M. Leslie, and John A. Sinicropi. "α-Hydroxy ketone precursors leading to a novel class of electro-optic acceptors." *Chemistry of Materials* 14, no. 5 (2002): 2393-2400. b) Liu, Sen, Marnie A. Haller, Hong Ma, Larry R. Dalton, Sei-Hum Jang, and Alex K-Y. Jen. "Focused Microwave-Assisted Synthesis of 2,5-Dihydrofuran Derivatives as Electron Acceptors for Highly Efficient Nonlinear Optical Chromophores." *Advanced Materials* 15, no. 7-8 (2003): 603-607.
4. (a) Teng, C. C., and H. T. Man. "Simple reflection technique for measuring the electro-optic coefficient of poled polymers." *Applied Physics Letters* 56, no. 18 (1990): 1734-1736. (b) Park, Dong H., Chi H. Lee, and Warren N. Herman. "Analysis of multiple reflection effects in reflective measurements of electro-optic coefficients of poled polymers in multilayer structures." *Optics Express* 14, no. 19 (2006): 8866-8884.
